# Supplementary material for: NF-κB Gene Signature Predicts Prostate Cancer Progression
Source: Oxford University Press journal article supplement (doi:10.1158/0008-5472.can-13-2543), 2014-03-31
Supplement: 00085472can132543-sup-can-13-2543figs1-8tabs1-2.pdf [file 00085472can132543-sup-can-13-2543figs1-8tabs1-2.pdf]

## SUPPLEMENTARY DATA:

**Supplementary Figure 1. NF- $\kappa$ B signaling is continuously activated in the prostate of I $\kappa$ B $\alpha$ <sup>+/-</sup> mouse.** In order to determine the NF- $\kappa$ B activity in the prostate of I $\kappa$ B $\alpha$ <sup>+/-</sup> mouse, we crossed the I $\kappa$ B $\alpha$ <sup>+/-</sup> mice with NGL, a NF- $\kappa$ B reporter mouse. NGL transgenic mice are engineered to express a GFP/luciferase fusion protein under the control of a promoter containing multiple NF- $\kappa$ B consensus binding sites (1). Since the NF- $\kappa$ B signaling in the I $\kappa$ B $\alpha$ <sup>+/-</sup> NGL mouse is activated in the whole body, the relatively high level of background activation does not allow detection of NF- $\kappa$ B activity in the prostate. Therefore, in order to determine the NF- $\kappa$ B activity in the prostate of the I $\kappa$ B $\alpha$ <sup>+/-</sup> mouse, we grafted the prostates from new born I $\kappa$ B $\alpha$ /NGL mice into the kidney capsule of male nude mice using a tissue rescue technique. NF- $\kappa$ B activity was measured at 7 weeks after grafting. The bioluminescence imaging shows NF- $\kappa$ B signaling is activated (green) in the kidney, where the grafted prostate from I $\kappa$ B $\alpha$ /NGL mouse resides (**B**). In panel (**A**), the control mouse (grafted with the prostate from NGL mouse) has no bioluminescence, illustrating that in the absence of I $\kappa$ B $\alpha$ <sup>+/-</sup>, there is not activation of NF- $\kappa$ B. The circles indicate kidney areas.

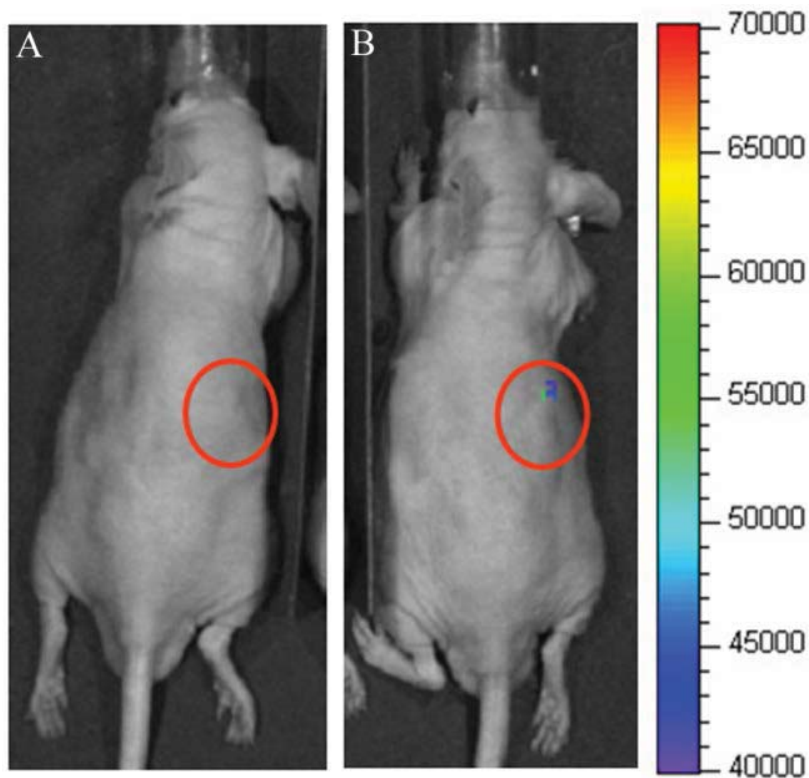

**Supplementary Figure 2. NF- $\kappa$ B signaling activated in the prostate of Myc/I $\kappa$ B $\alpha$  bigenic mouse.** The prostates from Myc alone (Myc) and bigenic (Myc/I $\kappa$ B $\alpha$ ) mice were harvested at 6 months of age. Activation of NF- $\kappa$ B signaling in the prostate was determined by IHC staining of p65-pho antibody.

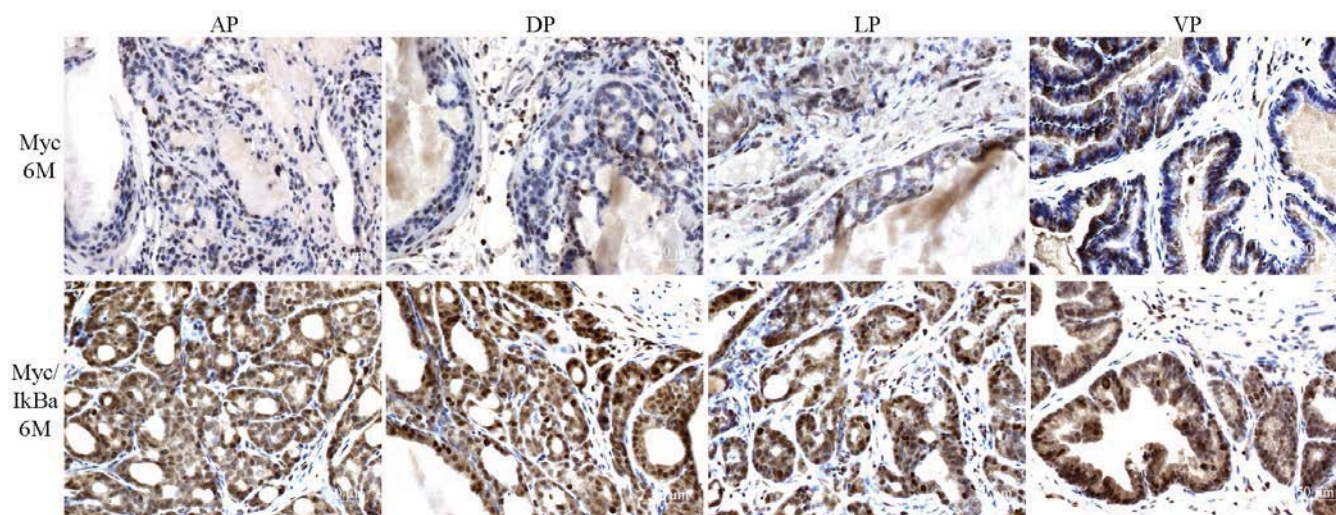

**Supplementary Figure 3. Continuous activation of NF- $\kappa$ B signaling promotes PCa progression in the Hi-Myc transgenic mouse.** The prostates from Myc alone (Myc) and bigenic (Myc/I $\kappa$ B $\alpha$ ) mice were harvested at 6 months of age. (A) Histological analysis was performed by H&E staining. IHC analyses were performed to determine AR expression and proliferation (Ki67) of the prostates. (B) Cells positive for Ki67 were counted by monitoring at least 200 luminal epithelial cells from 3-5 different fields of each sample and plotted as a percentage of total counted. The results are reported as mean value (%); bars,  $\pm$  SEM. \*  $P = 0.042$  by Student's  $t$  test ( $t$  test).

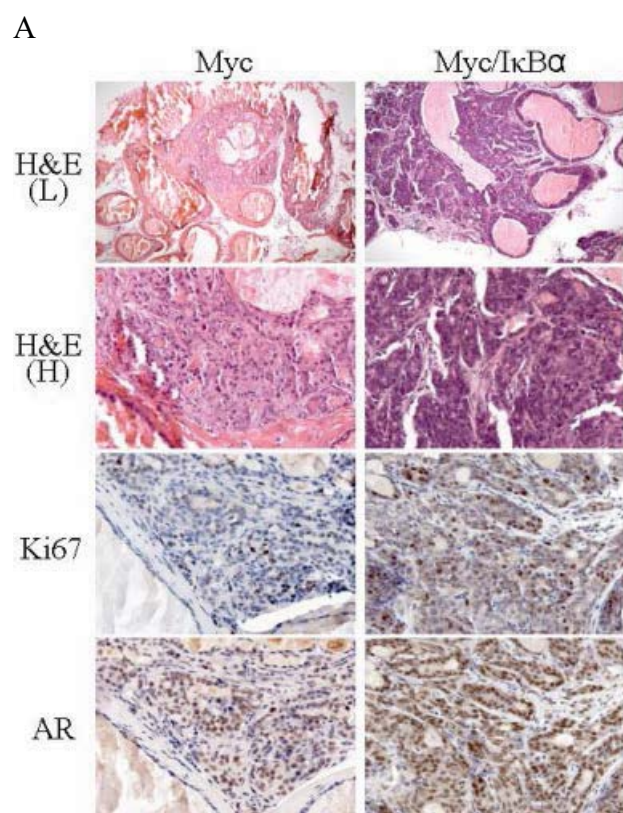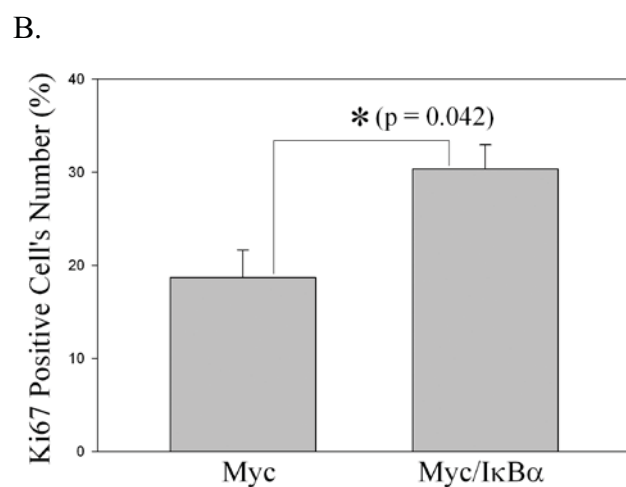

**Supplementary Figure 4. The NF24 gene signature predicts significant differences in the overall cancer-specific survival of the PCa patients.** Kaplan-Meier (KM) analyses were used to examine whether there was a significant association between overall cancer-specific survival prediction and the signature generated from NF- $\kappa$ B activated intact (no castration) mouse prostate (NF24). Two types of overall cancer-specific survival outcomes were compared in the plot: a poor-prognosis group (black dashed line) and a favorable-prognosis group (red solid line). The disease-specific survival time in years is displayed on the X-axis, and the Y-axis shows the probability of overall cancer-specific survival. *P* value is by log-rank test.

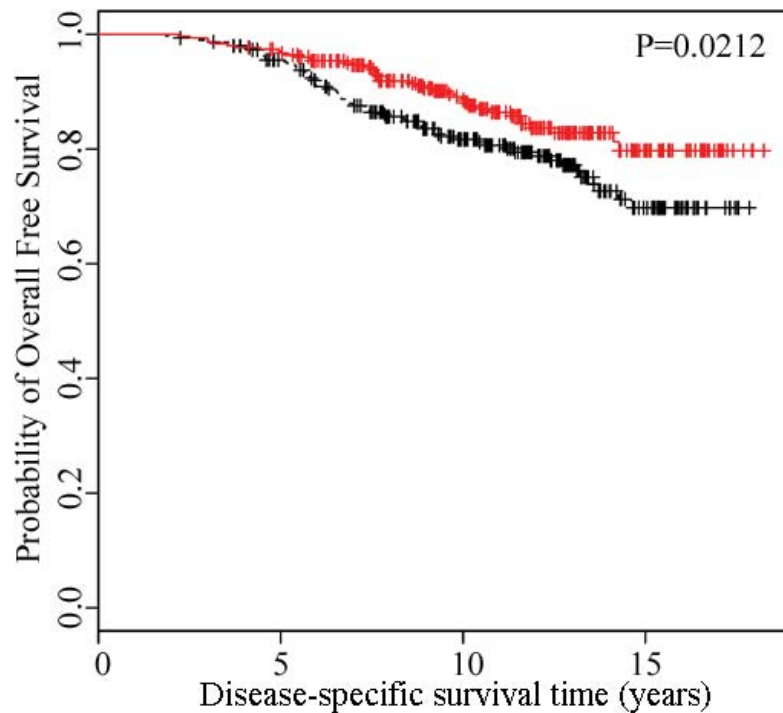

# Supplemental Figure 5. Molecular network analysis using Ingenuity Pathway Analysis (IPA).

Network associated with the NARP21 gene signature genes (21 genes) derived from NF- $\kappa$ B activated androgen depleted mouse prostate. The network was generated using the NARP21 gene set. Molecules are represented as nodes, and the biological relationship between two nodes is represented as an edge (line). Direct relationships are indicated by solid lines and indirect through dashed lines. Line beginnings and endings illustrate the direction of the relationship (e.g. arrow head indicates gene A influences gene B).

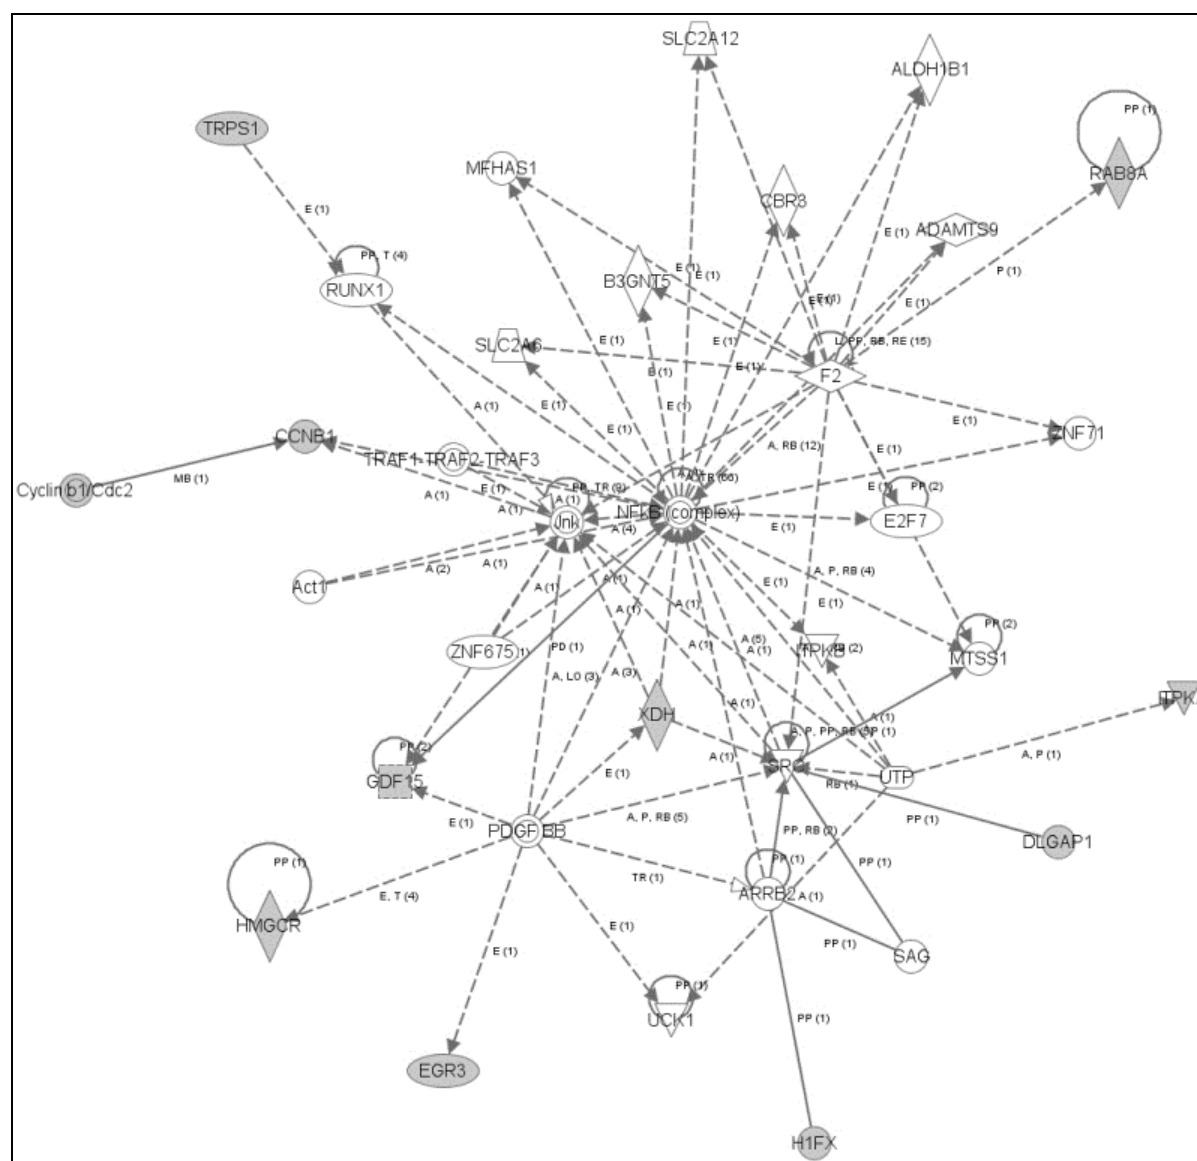



**Supplemental Figure 6. NF- $\kappa$ B signaling is activated/inactivated in PCa cells by infecting with IKK2-EE or IKK2-KD retroviral vectors.** NF- $\kappa$ B signaling was activated in LNCaP PCa cells by infecting with IKK2-EE retroviral vector, in which NF- $\kappa$ B activity was activated with a constitutively active (EE) mutants of IKK2 (2, 3); while NF- $\kappa$ B signaling was inactivated in C4-2B PCa cells by infecting with IKK2-KD retroviral vector, in which NF- $\kappa$ B activity was inhibited with a kinase dead (KD) IKK2 mutant (2, 3). The cells infected with empty vector were used as controls. NF- $\kappa$ B activity in PCa cells were measured by using a NF- $\kappa$ B responsive NGL reporter (1). The values plotted represent the mean of at least three individual samples  $\pm$  SEM.

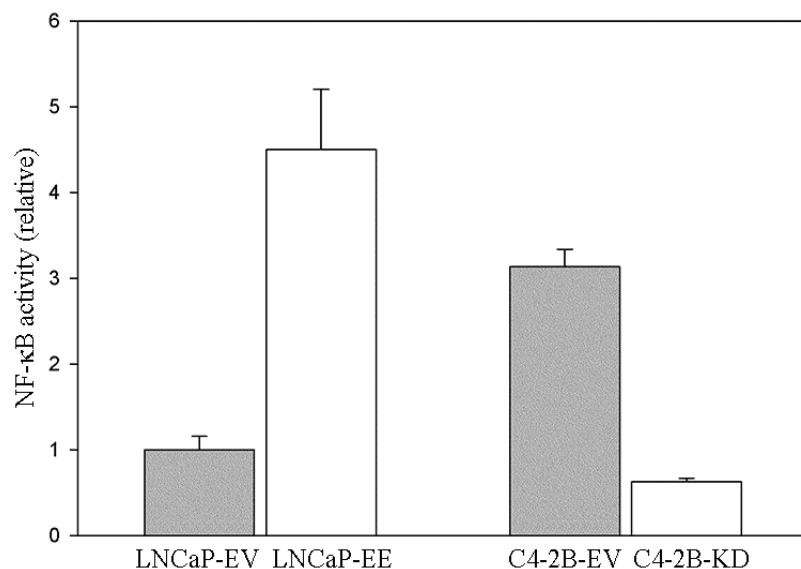

**Supplemental Figure 7. Activation of NF- $\kappa$ B signaling increases JNK phosphorylation in PCa cells.**

In order to further confirm that JNK phosphorylation is directly caused by activation of NF- $\kappa$ B signaling in PCa cells, NF- $\kappa$ B signaling was activated in LNCaP PCa cells by directly infecting with p65 expression adenoviral vector (LNCaP-p65). The cells infected with empty vector (LNCaP-EV) were used as controls. **(A)** NF- $\kappa$ B activity in PCa cells were measured by using a NF- $\kappa$ B responsive NGL reporter(1). The values plotted represent the mean of at least three individual samples  $\pm$  SEM. **(B)** Total and phosphorylated JNK levels in NF- $\kappa$ B activated (LNCaP-p65) or inactivated (LNCaP-EV) PCa cells were evaluated by Western blot.

**A**

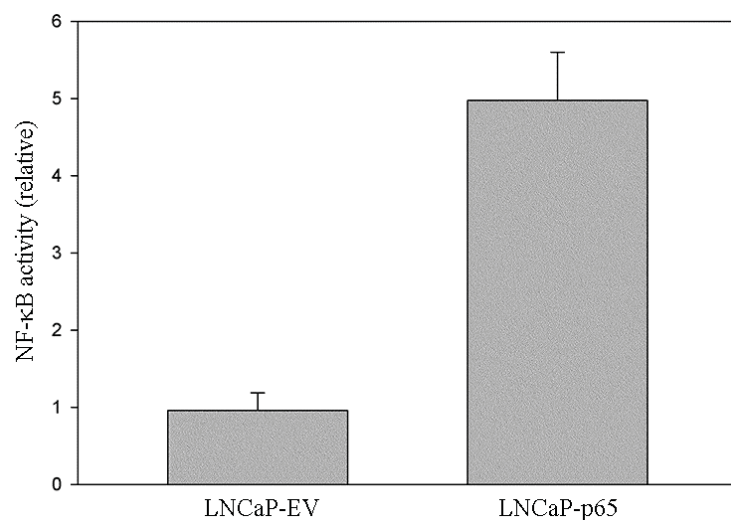

**B**

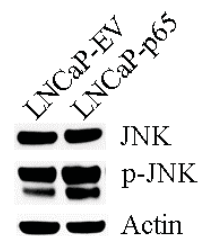

**Supplemental Figure 8. Blocking JNK signaling inhibits NF- $\kappa$ B induced invasive ability efficiently in PCa cells.** NF- $\kappa$ B activated LNCaP cells (LNCaP-EE: infected with IKK2-EE retroviral vector) were used to perform invasive assay. LNCaP cells infected with IKK2-EV retroviral vector (empty vector) (LNCaP-EV) were used as control. SP600125 ( $10^{-5}$ M) was used as JNK signaling inhibitor. Invasive ability was measured by Boyden chamber cell migration assay at 48 hour after treatment.

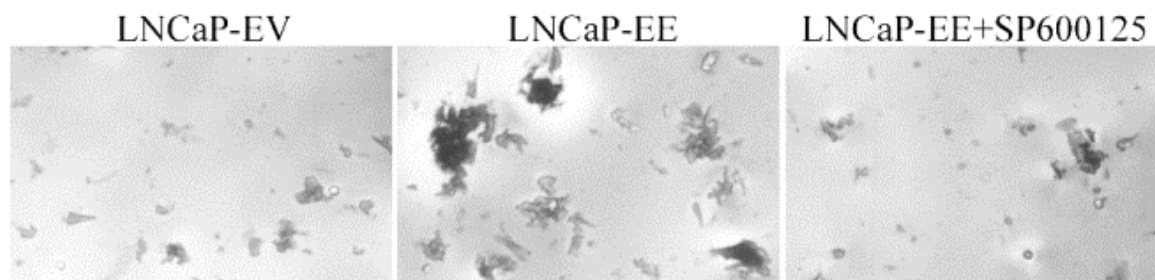



## SUPPLEMENTARY TABLES:

**Supplementary Table 1.** Matched human homolog genes list from NF- $\kappa$ B activated intact (no castration) mouse prostate (24 genes).

| Gene Symbol | Gene Title                                                                 |
|-------------|----------------------------------------------------------------------------|
| ABCC5       | "ATP-binding cassette, sub-family C (CFTR/MRP), member 5"                  |
| ANK3        | "ankyrin 3, epithelial"                                                    |
| CD38        | CD38 antigen                                                               |
| CD69        | CD69 antigen                                                               |
| CTSB        | cathepsin B                                                                |
| F5          | coagulation factor V                                                       |
| GLUD1       | glutamate dehydrogenase 1                                                  |
| IGFBP6      | insulin-like growth factor binding protein 6                               |
| LOX         | lysyl oxidase                                                              |
| MAPRE2      | "microtubule-associated protein, RP/EB family, member 2"                   |
| MEF2C       | myocyte enhancer factor 2C                                                 |
| MPP7        | "membrane protein, palmitoylated 7 (MAGUK p55 subfamily member 7)"         |
| MSMB        | beta-microseminoprotein                                                    |
| NOV         | nephroblastoma overexpressed gene                                          |
| PDGFRA      | "platelet derived growth factor receptor, alpha polypeptide"               |
| PRIC285     | CDNA sequence BC006779                                                     |
| RAD21       | RAD21 homolog (S. pombe)                                                   |
| RAP2B       | "RAP2B, member of RAS oncogene family"                                     |
| RNASEL      | "ribonuclease L (2', 5'-oligoadenylate synthetase-dependent)"              |
| SFRP4       | secreted frizzled-related sequence protein 4                               |
| ST6GAL1     | "beta galactoside alpha 2,6 sialyltransferase 1"                           |
| TNFRSF11B   | "tumor necrosis factor receptor superfamily, member 11b (osteoprotegerin)" |
| TRPS1       | Trichorhinophalangeal syndrome I (human)                                   |
| WISP1       | WNT1 inducible signaling pathway protein 1                                 |

**Supplementary Table 2.** Matched human homolog genes list from wild-type androgen depleted (castrated) mouse prostate (228 genes).

| <b>Gene Symbol</b> | <b>Description</b>                                                               |
|--------------------|----------------------------------------------------------------------------------|
| ABL1               | c-abl oncogene 1, receptor tyrosine kinase                                       |
| ADH1C              | alcohol dehydrogenase 1C (class I), gamma polypeptide                            |
| AKR1B1             | aldo-keto reductase family 1, member B1 (aldose reductase)                       |
| ALX3               | ALX homeobox 3                                                                   |
| ANG                | angiogenin, ribonuclease, RNase A family, 5                                      |
| ATP12A             | ATPase, H+/K+ transporting, nongastric, alpha polypeptide                        |
| BCL2L2             | BCL2-like 2                                                                      |
| TNFRSF17           | tumor necrosis factor receptor superfamily, member 17                            |
| BMP7               | bone morphogenetic protein 7                                                     |
| CAPN1              | calpain 1, (mu/I) large subunit                                                  |
| CCBL1              | cysteine conjugate-beta lyase, cytoplasmic                                       |
| MS4A3              | membrane-spanning 4-domains, subfamily A, member 3 (hematopoietic cell-specific) |
| CHRM1              | cholinergic receptor, muscarinic 1                                               |
| COL4A3             | collagen, type IV, alpha 3 (Goodpasture antigen)                                 |
| COL4A4             | collagen, type IV, alpha 4                                                       |
| CPB2               | carboxypeptidase B2 (plasma)                                                     |
| CLDN4              | claudin 4                                                                        |
| CRYGD              | crystallin, gamma D                                                              |
| CSRP1              | cysteine and glycine-rich protein 1                                              |
| DPP4               | dipeptidyl-peptidase 4                                                           |
| SLC26A3            | solute carrier family 26, member 3                                               |
| DUSP9              | dual specificity phosphatase 9                                                   |
| EIF4EBP2           | eukaryotic translation initiation factor 4E binding protein 2                    |
| EIF4G2             | eukaryotic translation initiation factor 4 gamma, 2                              |
| EN2                | engrailed homeobox 2                                                             |
| ERN1               | endoplasmic reticulum to nucleus signaling 1                                     |
| EXTL1              | exostoses (multiple)-like 1                                                      |
| FABP6              | fatty acid binding protein 6, ileal                                              |
| FGL1               | fibrinogen-like 1                                                                |
| FPGS               | folylpolyglutamate synthase                                                      |
| FUCA1              | fucosidase, alpha-L- 1, tissue                                                   |
| GAD2               | glutamate decarboxylase 2 (pancreatic islets and brain, 65kDa)                   |
| GATA3              | GATA binding protein 3                                                           |
| GLRB               | glycine receptor, beta                                                           |
| GRIN2B             | glutamate receptor, ionotropic, N-methyl D-aspartate 2B                          |
| GRM8               | glutamate receptor, metabotropic 8                                               |
| GYS1               | glycogen synthase 1 (muscle)                                                     |
| CFHR2              | complement factor H-related 2                                                    |

|          |                                                                                                             |
|----------|-------------------------------------------------------------------------------------------------------------|
| HLA-B    | major histocompatibility complex, class I, B                                                                |
| HSD17B2  | hydroxysteroid (17-beta) dehydrogenase 2                                                                    |
| IGJ      | immunoglobulin J polypeptide, linker protein for immunoglobulin alpha and mu polypeptides                   |
| ITPA     | inosine triphosphatase (nucleoside triphosphate pyrophosphatase)                                            |
| LRCH4    | leucine-rich repeats and calponin homology (CH) domain containing 4                                         |
| MAN1A1   | mannosidase, alpha, class 1A, member 1                                                                      |
| MLLT6    | myeloid/lymphoid or mixed-lineage leukemia (trithorax homolog, Drosophila); translocated to, 6              |
| MMP7     | matrix metalloproteinase 7 (matrilysin, uterine)                                                            |
| MSMB     | microseminoprotein, beta-                                                                                   |
| MT1E     | metallothionein 1E                                                                                          |
| MT1F     | metallothionein 1F                                                                                          |
| MYCL1    | v-myc myelocytomatosis viral oncogene homolog 1, lung carcinoma derived (avian)                             |
| NINJ1    | ninjurin 1                                                                                                  |
| NKX3-1   | NK3 homeobox 1                                                                                              |
| NODAL    | nodal homolog (mouse)                                                                                       |
| SERPINA5 | serpin peptidase inhibitor, clade A (alpha-1 antiproteinase, antitrypsin), member 5                         |
| PCK1     | phosphoenolpyruvate carboxykinase 1 (soluble)                                                               |
| PDE6H    | phosphodiesterase 6H, cGMP-specific, cone, gamma                                                            |
| PITX1    | paired-like homeodomain 1                                                                                   |
| PKP2     | plakophilin 2                                                                                               |
| PLXNB3   | plexin B3                                                                                                   |
| PNLIPRP2 | pancreatic lipase-related protein 2                                                                         |
| POU2AF1  | POU class 2 associating factor 1                                                                            |
| PSEN1    | presenilin 1                                                                                                |
| QSOX1    | quiescin Q6 sulfhydryl oxidase 1                                                                            |
| RABIF    | RAB interacting factor                                                                                      |
| RNASE1   | ribonuclease, RNase A family, 1 (pancreatic)                                                                |
| RPS9     | ribosomal protein S9                                                                                        |
| SORT1    | sortilin 1                                                                                                  |
| SFRP5    | secreted frizzled-related protein 5                                                                         |
| SH3GL2   | SH3-domain GRB2-like 2                                                                                      |
| SLC4A1   | solute carrier family 4, anion exchanger, member 1 (erythrocyte membrane protein band 3, Diego blood group) |
| SLC7A4   | solute carrier family 7 (cationic amino acid transporter, y+ system), member 4                              |
| SLC9A2   | solute carrier family 9 (sodium/hydrogen exchanger), member 2                                               |
| SLC18A1  | solute carrier family 18 (vesicular monoamine), member 1                                                    |
| SORD     | sorbitol dehydrogenase                                                                                      |
| STAT5A   | signal transducer and activator of transcription 5A                                                         |
| SULT1E1  | sulfotransferase family 1E, estrogen-preferring, member 1                                                   |
| TACR3    | tachykinin receptor 3                                                                                       |
| TAF4B    | TAF4b RNA polymerase II, TATA box binding protein (TBP)-associated factor, 105kDa                           |
| TCF15    | transcription factor 15 (basic helix-loop-helix)                                                            |

|          |                                                                                   |
|----------|-----------------------------------------------------------------------------------|
| TIMP4    | TIMP metalloproteinase inhibitor 4                                                |
| TP53     | tumor protein p53                                                                 |
| TRPC1    | transient receptor potential cation channel, subfamily C, member 1                |
| TST      | thiosulfate sulfurtransferase (rhodanese)                                         |
| ZIC3     | Zic family member 3 (odd-paired homolog, Drosophila)                              |
| ZBTB16   | zinc finger and BTB domain containing 16                                          |
| SLC30A2  | solute carrier family 30 (zinc transporter), member 2                             |
| GLRA3    | glycine receptor, alpha 3                                                         |
| DGCR6    | DiGeorge syndrome critical region gene 6                                          |
| FZD7     | frizzled homolog 7 (Drosophila)                                                   |
| PLA2G6   | phospholipase A2, group VI (cytosolic, calcium-independent)                       |
| ADAM7    | ADAM metalloproteinase domain 7                                                   |
| TRIM24   | tripartite motif-containing 24                                                    |
| BRSK2    | BR serine/threonine kinase 2                                                      |
| SYT7     | synaptotagmin VII                                                                 |
| ANGPTL1  | angiopoietin-like 1                                                               |
| SYNGR3   | synaptogyrin 3                                                                    |
| FIBP     | fibroblast growth factor (acidic) intracellular binding protein                   |
| SLC4A8   | solute carrier family 4, sodium bicarbonate cotransporter, member 8               |
| BAG4     | BCL2-associated athanogene 4                                                      |
| PTGES    | prostaglandin E synthase                                                          |
| PRDX6    | peroxiredoxin 6                                                                   |
| NUP155   | nucleoporin 155kDa                                                                |
| SH3PXD2A | SH3 and PX domains 2A                                                             |
| KIAA0232 | KIAA0232                                                                          |
| TRIM14   | tripartite motif-containing 14                                                    |
| SETDB1   | SET domain, bifurcated 1                                                          |
| TELO2    | TEL2, telomere maintenance 2, homolog (S. cerevisiae)                             |
| HS3ST2   | heparan sulfate (glucosamine) 3-O-sulfotransferase 2                              |
| REC8     | REC8 homolog (yeast)                                                              |
| PREB     | prolactin regulatory element binding                                              |
| KCNMB2   | potassium large conductance calcium-activated channel, subfamily M, beta member 2 |
| TESK2    | testis-specific kinase 2                                                          |
| OLFM4    | olfactomedin 4                                                                    |
| SORBS1   | sorbin and SH3 domain containing 1                                                |
| FUT9     | fucosyltransferase 9 (alpha (1,3) fucosyltransferase)                             |
| IQGAP2   | IQ motif containing GTPase activating protein 2                                   |
| C1QL1    | complement component 1, q subcomponent-like 1                                     |
| KDELRL1  | KDEL (Lys-Asp-Glu-Leu) endoplasmic reticulum protein retention receptor 1         |
| OS9      | osteosarcoma amplified 9, endoplasmic reticulum lectin                            |
| WWP2     | WW domain containing E3 ubiquitin protein ligase 2                                |

|          |                                                                              |
|----------|------------------------------------------------------------------------------|
| CAPN10   | calpain 10                                                                   |
| NISCH    | nischarin                                                                    |
| SBNO2    | strawberry notch homolog 2 (Drosophila)                                      |
| HABP4    | hyaluronan binding protein 4                                                 |
| DKK1     | dickkopf homolog 1 (Xenopus laevis)                                          |
| TRIM2    | tripartite motif-containing 2                                                |
| GSPT2    | G1 to S phase transition 2                                                   |
| C9orf5   | chromosome 9 open reading frame 5                                            |
| ZNF473   | zinc finger protein 473                                                      |
| PNKD     | paroxysmal nonkinesigenic dyskinesia                                         |
| ACOT11   | acyl-CoA thioesterase 11                                                     |
| CCDC9    | coiled-coil domain containing 9                                              |
| EHF      | ets homologous factor                                                        |
| SRPK3    | SRSF protein kinase 3                                                        |
| ATP2C1   | ATPase, Ca <sup>++</sup> transporting, type 2C, member 1                     |
| CACNG4   | calcium channel, voltage-dependent, gamma subunit 4                          |
| CCDC22   | coiled-coil domain containing 22                                             |
| COMMD9   | COMM domain containing 9                                                     |
| SEC61A1  | Sec61 alpha 1 subunit (S. cerevisiae)                                        |
| BOLA1    | bolA homolog 1 (E. coli)                                                     |
| DERA     | deoxyribose-phosphate aldolase (putative)                                    |
| TFB1M    | transcription factor B1, mitochondrial                                       |
| HSD17B14 | hydroxysteroid (17-beta) dehydrogenase 14                                    |
| USP53    | ubiquitin specific peptidase 53                                              |
| SDK2     | sidekick homolog 2 (chicken)                                                 |
| AFTPH    | aftiphilin                                                                   |
| QPCTL    | glutaminyI-peptide cyclotransferase-like                                     |
| PDPR     | pyruvate dehydrogenase phosphatase regulatory subunit                        |
| ACOXL    | acyl-CoA oxidase-like                                                        |
| ELAC1    | elaC homolog 1 (E. coli)                                                     |
| MYO5C    | myosin VC                                                                    |
| AJAP1    | adherens junctions associated protein 1                                      |
| NXF2     | nuclear RNA export factor 2                                                  |
| TDRD1    | tudor domain containing 1                                                    |
| C16orf61 | chromosome 16 open reading frame 61                                          |
| BBX      | bobby sox homolog (Drosophila)                                               |
| PLEKHH1  | pleckstrin homology domain containing, family H (with MyTH4 domain) member 1 |
| KIAA1549 | KIAA1549                                                                     |
| RINT1    | RAD50 interactor 1                                                           |
| CELA2A   | chymotrypsin-like elastase family, member 2A                                 |
| MRPL17   | mitochondrial ribosomal protein L17                                          |

|          |                                                                            |
|----------|----------------------------------------------------------------------------|
| NEUROG2  | neurogenin 2                                                               |
| SLC28A3  | solute carrier family 28 (sodium-coupled nucleoside transporter), member 3 |
| MCCC2    | methylcrotonoyl-CoA carboxylase 2 (beta)                                   |
| HIF3A    | hypoxia inducible factor 3, alpha subunit                                  |
| NDST4    | N-deacetylase/N-sulfotransferase (heparan glucosaminyl) 4                  |
| NUCKS1   | nuclear casein kinase and cyclin-dependent kinase substrate 1              |
| AACS     | acetoacetyl-CoA synthetase                                                 |
| ZBTB10   | zinc finger and BTB domain containing 10                                   |
| YIPF2    | Yip1 domain family, member 2                                               |
| ADIPOR2  | adiponectin receptor 2                                                     |
| MORN1    | MORN repeat containing 1                                                   |
| GRHL2    | grainyhead-like 2 (Drosophila)                                             |
| TRABD    | TraB domain containing                                                     |
| LRRC27   | leucine rich repeat containing 27                                          |
| STARD5   | StAR-related lipid transfer (START) domain containing 5                    |
| CYB5B    | cytochrome b5 type B (outer mitochondrial membrane)                        |
| TRIM7    | tripartite motif-containing 7                                              |
| ZNF503   | zinc finger protein 503                                                    |
| ATAD1    | ATPase family, AAA domain containing 1                                     |
| KNDC1    | kinase non-catalytic C-lobe domain (KIND) containing 1                     |
| SCRT2    | scratch homolog 2, zinc finger protein (Drosophila)                        |
| CEACAM21 | carcinoembryonic antigen-related cell adhesion molecule 21                 |
| OTOP2    | otopetrin 2                                                                |
| PEX11G   | peroxisomal biogenesis factor 11 gamma                                     |
| B3GNT7   | UDP-GlcNAc:betaGal beta-1,3-N-acetylglucosaminyltransferase 7              |
| CACNA2D4 | calcium channel, voltage-dependent, alpha 2/delta subunit 4                |
| ARHGAP18 | Rho GTPase activating protein 18                                           |
| RP1L1    | retinitis pigmentosa 1-like 1                                              |
| ERI2     | ERI1 exoribonuclease family member 2                                       |
| GLB1L3   | galactosidase, beta 1-like 3                                               |
| OSBPL6   | oxysterol binding protein-like 6                                           |
| RAB39B   | RAB39B, member RAS oncogene family                                         |
| RFFL     | ring finger and FYVE-like domain containing 1                              |
| SP7      | Sp7 transcription factor                                                   |
| C13orf26 | chromosome 13 open reading frame 26                                        |
| DEGS2    | degenerative spermatocyte homolog 2, lipid desaturase (Drosophila)         |
| MSI2     | musashi homolog 2 (Drosophila)                                             |
| TATDN3   | TatD DNase domain containing 3                                             |
| LYPD6    | LY6/PLAUR domain containing 6                                              |
| TMEM42   | transmembrane protein 42                                                   |
| UROC1    | urocanase domain containing 1                                              |



|           |                                                                                      |
|-----------|--------------------------------------------------------------------------------------|
| IL17RE    | interleukin 17 receptor E                                                            |
| ADHFE1    | alcohol dehydrogenase, iron containing, 1                                            |
| TMEM56    | transmembrane protein 56                                                             |
| MBOAT1    | membrane bound O-acyltransferase domain containing 1                                 |
| WBP2NL    | WBP2 N-terminal like                                                                 |
| SGMS2     | sphingomyelin synthase 2                                                             |
| C6orf81   | chromosome 6 open reading frame 81                                                   |
| C7orf47   | chromosome 7 open reading frame 47                                                   |
| ATP6V1C2  | ATPase, H <sup>+</sup> transporting, lysosomal 42kDa, V1 subunit C2                  |
| SLC25A30  | solute carrier family 25, member 30                                                  |
| WDR27     | WD repeat domain 27                                                                  |
| TTLL10    | tubulin tyrosine ligase-like family, member 10                                       |
| SERPINA11 | serpin peptidase inhibitor, clade A (alpha-1 antiproteinase, antitrypsin), member 11 |
| THEM5     | thioesterase superfamily member 5                                                    |
| C1orf185  | chromosome 1 open reading frame 185                                                  |
| RNF149    | ring finger protein 149                                                              |
| C14orf39  | chromosome 14 open reading frame 39                                                  |
| KRTAP19-3 | keratin associated protein 19-3                                                      |
| NLRP10    | NLR family, pyrin domain containing 10                                               |
| TSPAN33   | tetraspanin 33                                                                       |
| KIAA2022  | KIAA2022                                                                             |
| BARHL2    | BarH-like homeobox 2                                                                 |
| PTAR1     | protein prenyltransferase alpha subunit repeat containing 1                          |
| WIPF3     | WAS/WASL interacting protein family, member 3                                        |
| SPINK8    | serine peptidase inhibitor, Kazal type 8 (putative)                                  |
| NXF2B     | nuclear RNA export factor 2B                                                         |

**Supplementary Table 3.** Stratification of 77 PCa patients who had lymph node metastasis at the time of RRP surgery based on the NARP21 gene signature and clinical outcome (systemic metastasis).

| Years (post surgery)                          | 3           | 5           | 7             | 10            | More then 10  |
|-----------------------------------------------|-------------|-------------|---------------|---------------|---------------|
| Favorable-prognosis<br>Group (10/23 cases)(%) | 3<br>(30 %) | 5<br>(20%)  | 6<br>(17.6%)  | 8<br>(18.6%)  | 10<br>(21.3%) |
| Poor-prognosis<br>Group (37/54 cases)(%)      | 7<br>(70%)  | 20<br>(80%) | 28<br>(82.4%) | 35<br>(81.4%) | 37<br>(78.7%) |
| Total (47/77)                                 | 10 (13%)    | 25 (32.5%)  | 34 (44.2%)    | 43 (55.8%)    | 47 (61%)      |

## References:

1. Everhart MB, Han W, Sherrill TP, Arutiunov M, Polosukhin VV, Burke JR, et al. Duration and Intensity of NF- $\kappa$ B Activity Determine the Severity of Endotoxin-Induced Acute Lung Injury. *JImmunol.* 2006;176:4995-5005.
2. Diessenbacher P, Hupe M, Sprick MR, Kerstan A, Geserick P, Haas TL, et al. NF-kappaB inhibition reveals differential mechanisms of TNF versus TRAIL-induced apoptosis upstream or at the level of caspase-8 activation independent of cIAP2. *JInvest Dermatol.* 2008;128:1134-47.
3. Leverkus M, Sprick MR, Wachter T, Denk A, Brocker EB, Walczak H, et al. TRAIL-induced apoptosis and gene induction in HaCaT keratinocytes: differential contribution of TRAIL receptors 1 and 2. *JInvest Dermatol.* 2003;121:149-55.
